# Supplementary material
Source: PubMed Central journal article supplement (PMC7230027)
Supplement: NIHMS1587349-supplement-Supplementary_Material.pdf [file NIHMS1587349-supplement-Supplementary_Material.pdf]

## SUPPORTING INFORMATION

### **Efficient and reproducible multigene expression after single-step transfection using improved BAC transgenesis and engineering toolkit**

Binhui Zhao<sup>1,†,#</sup>, Pankaj Chaturvedi<sup>1,†</sup>, David L. Zimmerman<sup>1,‡</sup> and Andrew S. Belmont<sup>1,§,\*</sup>

<sup>1</sup> Department of Cell and Developmental Biology, University of Illinois, Urbana, Illinois, 61801, United States of America

<sup>#</sup> Present Address: Stanley Center for Psychiatric Research, Broad Institute of MIT and Harvard, Cambridge, MA 02142, USA.

<sup>‡</sup> Present Address: Biology Department, College of the Ozarks, Point Lookout, Missouri, 65726, United States of America

<sup>§</sup> Carl R. Woese Institute for Genomic Biology, University of Illinois at Urbana-Champaign, Urbana, IL 61801, USA.

\* Email: [asbel@illinois.edu](mailto:asbel@illinois.edu). Tel: +1-217-244-2311

**Supplementary Table S1: List of primers used in this study.**

| Dual-reporter promoter assay |                                   |                                                                |                                                               |
|------------------------------|-----------------------------------|----------------------------------------------------------------|---------------------------------------------------------------|
| Primer ID                    | Primer sequence                   | Description                                                    | PCR product size                                              |
| BZ#127                       | TTAAGCGGCCGCTCGTCATCACTGAGGTGGAG  | NotI-hEEF1a promoter forward primer                            | 1.2kb                                                         |
| BZ#204                       | TTAAGCGCGCCACGACACCTGAAATGGAAG    | AscI-hEEF1a promoter reverse primer                            |                                                               |
| BZ#210                       | TTAAGCGGCCGATGACAGCAGAGATCCAGTTT  | NotI-hUBC promoter (pUGG as template) forward primer           | 1.4kb                                                         |
| BZ#211                       | TTCCACCGGTGAAGCTACTGTACACCAACCT   | AgeI-hUBC promoter (pUGG as template) reverse primer           |                                                               |
| BZ#151                       | TTAAGCGGCCCAAGCAAACAATCAAGAGCA    | NotI-hRPL32 promoter forward primer                            | 2.2kb                                                         |
| BZ#152                       | GGCCACCGGTGATGCCTTTTGGGAAGA       | AgeI-hRPL32 promoter reverse primer                            |                                                               |
| BZ#147                       | TTAAGCGCGCCTGCTCTACGTTTTAGGATGGAG | AscI-hPIIA promoter forward primer                             | 2.7kb                                                         |
| BZ#148                       | GGCCACCGGTGGCTAATAGTACACGTTTTCTC  | AgeI-hPIIA promoter reverse primer                             |                                                               |
| BZ#141                       | TTAAGCGGCCGATGGCGGCACCTATTTATG    | NotI-hB2M promoter forward primer                              | 1.1kb                                                         |
| BZ#142                       | GGCCACCGGTGCTGTCAGCTTCAGGAATG     | AgeI-hB2M promoter reverse primer                              |                                                               |
| BZ#135                       | TTAAGCGGCCGCTGGGTGTAGTGGGAGGTAGG  | NotI-hRPS3A promoter forward primer                            | 1.4kb                                                         |
| BZ#136                       | GGCCACCGGTCTGGTCAGAGAGCCAAAAGG    | AgeI-hRPS3A promoter reverse primer                            |                                                               |
| BZ#153                       | TTAAGCGCGCCAGAAGGTGGATTTGGTGAGC   | AscI-hGUSB promoter forward primer                             | 2.3kb                                                         |
| BZ#154                       | GGCCACCGGTCCATCTTGGTTGAGGACGAG    | AgeI-hGUSB promoter reverse primer                             |                                                               |
| HB2-RZ-check 5' NEW f        | TTG CTC CCC TGT AAA CTG CT        | forward primer for checking 5' junction of mRFP expression ca: | 2-4kb, depending on the size of the promoter in front of mRFP |
| HB2-RZ-check 5' NEW r        | CTT GGC CAT GTA GGT GGT CT        | reverse primer for checking 5' junction of mRFP expression ca: |                                                               |
| HB2-RZ-check 3' f            | CTA TGA AAG GTT GGG CTT CG        | forward primer for checking 3' junction of mRFP expression ca: | 2kb                                                           |
| HB2-RZ-check 3' r            | AGT AGC TGG GGC TGG GTA AT        | reverse primer for checking 3' junction of mRFP expression ca: |                                                               |

  

| Construction of BACs containing the UBC-GFP-Zeocin cassette |                                                                                            |
|-------------------------------------------------------------|--------------------------------------------------------------------------------------------|
| Primer Id                                                   | Sequence                                                                                   |
| ForBAC-UBBrec                                               | AGCAAAGTGCTCAAATATGCTCAGTCATGGAGTGGAGACAGATAAGTAAACAGACGCTGGGAATAGAGTGGAGacagcagagatccagt  |
| RevBAC-UBBrec                                               | AATGCCAATGCAGCACCTTGCTTGACTCTGGCCTGGCTCTGTATCACGACATATCCCAGCATCTGTTTATTATtgttgctagtgcg     |
| ForBAC-DHFRrec                                              | ATAAGTTCATGGGGTACAGTTTAGCCTGTAAACCATGAATGCACATCTGTACATGCATTATTCATTGTTCTATGacagcagagatccagt |
| RevBAC-DHFRrec                                              | TAATGGTTTTCTCCAGAAATCCTAATTCTGATATTATACCAAGAGCAACTTCAGAATAAGTTTCTAGAATTtgttgctagtgcg       |
| ForBAC2207K13rec                                            | CCAGGGCCTTTTTAGTGGATGTTAATGAGAACAAAGAAACCTCCTCCTAACATGGCGAAAGTCTTGTATCAGacagcagagatccagt   |
| RevBAC2207K13rev                                            | TGTTTCATCCAAGATCAAACAATGGGTCAATTCATCAGCTCCTTTAAATAATGCATCTAGAAAGTGAAAAATAGtgttgctagtgcg    |
| ForROSArec                                                  | AGATTGGACCTATTCTGAAGCCAGGCTGTCCAACCTAAACGAGTCTGTCTTACCTACACCAACAAGTATTcagcagagatccagt      |
| RevROSArec                                                  | TAGAGTAAAAGTTGACCATAGTGGGACCTGGTCAAGCAGACTACAATAGCAGAATCAGCGGTATACCTGTAATtgttgctagtgcg     |
| ForHBBrec                                                   | TCTTCCGGATCATGCTTACAGATCTGATTACACCAAGAAGCCTAAATTGTGTGTCAGCCAACTAGATGTGGACacagcagagatccagt  |
| RevHBBrec                                                   | AACCACCTATCACAGATTCTGCTTCAAAGGCACTCATCTTGGTGAATGAATATCTAGTCCCAGAAGGAGGCTAtgttgctagtgcg     |

  

| For screening of correct insertions |                           |
|-------------------------------------|---------------------------|
| Primer Id                           | Sequence                  |
| ForUBB-PCR                          | GCCTGCTGAGTAAATAAACATGTTG |
| RevUBB-PCR                          | TTCACACCTTTTCTGCAGGAA     |
| ForDHFR-PCR                         | CTTAGGTATGCTAGGCTATGGA    |
| RevDHFR-PCR                         | CTCAGGTTATATGCCTCGAGT     |
| ForBAC2207K13PCR                    | CAGGCAGATGTACTTCTGAGTGA   |

|                  |                        |
|------------------|------------------------|
| RevBAC2207K13PCR | AGCTTATGACTGCTCCTGCTGT |
| ForROSA-PCR      | ACCATCTGGTTCTGTTGGAGT  |
| RevROSA-PCR      | TCTGGTCTGTCTGAAGACAGC  |
| ForHBB-PCR       | AGGCCTTCTGAAAGCTTACGAT |
| RevHBB-PCR       | CACACACATGGGCATACATATC |
| GalKORFforw      | GTGAACACACCGACTACAACGA |
| GalKORFrev       | TCGTTGTAGTCGGTGTGTTTAC |

#### Transgene copy number estimation

| Primer Id   | Sequence              | Description                                      |
|-------------|-----------------------|--------------------------------------------------|
| SGKforw     | TGCGTGGTCAGTACCCTAGC  | mouse <i>Sgk1</i> , endogenous control, forward  |
| SGKrev      | ATCCGGTAGCCCAAAGGAG   | mouse <i>Sgk1</i> , endogenous control, reverse  |
| mHPRT1for   | ACGAGGAGTCCCTGTTGATGT | mouse <i>Hprt1</i> , endogenous control, forward |
| mHPRT1rev   | GGACGCAGCAACTGACATT   | mouse <i>Hprt1</i> , endogenous control, reverse |
| Zeo-GFP2for | CCAACTTCAGGGATGCCAGT  | UBC-GFP-ZeoR copy number, forward                |
| Zeo-GFP2rev | TGGCCAGCTAGCTTTAGTCC  | UBC-GFP-ZeoR copy number, reverse                |

#### Primers used for multi-reporter bac construction

|                  |                                                                                                                                                                                                                                            |
|------------------|--------------------------------------------------------------------------------------------------------------------------------------------------------------------------------------------------------------------------------------------|
| DH2-4rev         | tactatgtgacagccaatgtgagt                                                                                                                                                                                                                   |
| DH3-1for         | atcaagactgcatcttcagctca                                                                                                                                                                                                                    |
| DH3-4rev         | agctgacagcacacgtgtgta                                                                                                                                                                                                                      |
| DHM2-Seq2        | TCACGTACCCACCGTCTAGT                                                                                                                                                                                                                       |
| DHM4F2-Fw        | gcagtagcctcgcactgtactatagaatCCTCAGTGATAAAAATTGTTATCTGAT                                                                                                                                                                                    |
| DHM4F2-R         | TACCACCTGTGGCATTGGAATAG                                                                                                                                                                                                                    |
| DHM4F3-R         | AAGGAAATGTGTAGGAAATGGGT                                                                                                                                                                                                                    |
| ForCerFib        | ggggtaccATG GTG AGC AAG GGC GAG GAG                                                                                                                                                                                                        |
| Fw-M4F2-BamHI    | AGCGAGAGCGGATCCTGGATGGTCTGTAAGTTTGATTGGG                                                                                                                                                                                                   |
| GA-hRPL32-fwd    | atgttcttctcgttataAAGCAAAACAAATCAAGAGC                                                                                                                                                                                                      |
| GA-hRPL32-rev    | ccattcgcgcaagatcGATGCCTTTTGGGGAAGAAG                                                                                                                                                                                                       |
| GA-RM01-Spec-For | atttccccgaaaagtgccacctgggtcctTAACAAATAAGCCACCTAAAG                                                                                                                                                                                         |
| GA-RM01-Spec-Rev | tttaaaatacctcgcgagtggaacactgaACTATGCATGTGTCTTCTC                                                                                                                                                                                           |
| GA-RM02-Spec-For | atttccccgaaaagtgccacctgggtcctCTGTAGATGTTTATTTAGGTTG                                                                                                                                                                                        |
| GA-RM02-Spec-Rev | tttaaaatacctcgcgagtggaacactgaGACAAAGATGAAATACATTTTCTCAG                                                                                                                                                                                    |
| GA-RM03-Spec-For | atttccccgaaaagtgccacctgggtcctGTGCTCTTTCAAACCTAATG                                                                                                                                                                                          |
| GA-RM03-Spec-Rev | tttaaaatacctcgcgagtggaacactgaATGTTCTAAGAAATATATATGGAAAC                                                                                                                                                                                    |
| GA-SNAP-fwd      | aaaaggcatcgtatcttgcgcaATGGACAAAGACTGCGAAATGAAGC                                                                                                                                                                                            |
| GA-SNAP-rev      | gccatggatctgagtcggaGGATCCGCCTGCAGGACC                                                                                                                                                                                                      |
| M1F4-AgeIrev     | AGCGAGAGCACCGGTgagtcctcattacatgcaccatc                                                                                                                                                                                                     |
| M1F4-BamHIfor    | AGCGAGAGCGGATCCGTTTAAACATAATGATATTCAGGTGCATCCA                                                                                                                                                                                             |
| M2F1-pRS413      | GCATACGATATATACATGTGTATATATGTATACCTATGAATGTCAGTAAAGTATGTATACGAACAGTATGATACTGAAGATGACAAGGTAATGCATCATTCTATACGTG' CATTCTGAACGAGGAGCGAGAGCACCGGTgcagtgcccttctcgtcggctctgtcactatatagccaccagaggtctgcctatgcttctgtaacacagttccctttctctcatatggctaatt |
| M2F12-AgeIFor    | AGCGAGAGCACCGGTgcagtgcccttctcgtcgc                                                                                                                                                                                                         |

M2F12-PshRev AGCGAGAGCGACGTCTGTCTGCTCACAAATCAAGCCTTGAAGAC

M2F1rev AGCGAGAGCACCGGTGGACCAGAAGCCTCTAAGACCT

M2F4-AgelRev AGCGAGAGCACCGGTACAGCGTGTGGCACAGAGAG

M2F4-BamHlfor AGCGAGAGCGGATCCggttgaataaaccagcacttacagac

M2F4-pRS413 tgcactttgtcctgtcagtgactaggttctgtcagcattagttgcaagttggcaaggtgaaaggcacttctctcctgtcaggacaactggcctctctgtgccacacgctgtACCGGTGCTCTCGCTCGGTAATACGGTT  
ATCCACAGAATCAGGGGATAACGCAGGAAAGAACATGTGAGCAAAAGGCCAGCAAAAGGCCAGGAACCGTAAAAAGGCCGCGTTGCTGGCGTTTTCCATA

M3-F3For TACGCTGCGTCTCCtgacacatgatccttctccaccagct

M3F1-AgelFor AGCGAGAGCACCGGTAGAGTACTTACTATCAGCCCTATCC

M3F1-pRS413 GCATACGATATATACATGTGTATATATGTATACCTATGAATGTCAGTAAAGTATGTATACGAACAGTATGATACTGAAGATGACAAGGTAATGCATCATTCTATACGTG'  
CATTCTGAACGAGGAGCGAGAGCACCGGT agagtacttactatcagccctatcctgtctcctgttcaaggtctactgtcatttccatcgccctaaatcccggttagtgatgtcagagactgtatcctcatctga

M3F1-PshRev AGCGAGAGCGACGTCTGTCCAAGGCCGAGATCACAGGCT

M3F3-BamHlrev AGTCACACAGGTCCATGACATTC

M3F4-AgelRev AGCGAGAGCACCGGTccaaccaaggccaacaacagat

M3F4-BamHlfor AGCGAGAGCGGATCCCTGCATGAGCTCTGGCTATGC

M3F4-PCR-Fw ctgcatgagctctggctatgca

M3F4-pRS413 tgaagaggacagaaggctacacacgtgtcctgtcagcttgaaggtgtcacccctgattgtaattagttaccctgtacgaaaggcagaataaactctgttggccttggggACCGGTGCTCTCGCTCGGTAATACGG  
TTATCCACAGAATCAGGGGATAACGCAGGAAAGAACATGTGAGCAAAAGGCCAGCAAAAGGCCAGGAACCGTAAAAAGGCCGCGTTGCTGGCGTTTTCCATA

M4F1-AgelFor AGCGAGAGCACCGGTGGGAGTCTTCTAGAAGCAAAGAG

M4F1-PCR-Rev ttctcctaagagctgcttctacc

M4F1-pRS413 GCATACGATATATACATGTGTATATATGTATACCTATGAATGTCAGTAAAGTATGTATACGAACAGTATGATACTGAAGATGACAAGGTAATGCATCATTCTATACGTG'  
CATTCTGAACGAGGAGCGAGAGCACCGGTgggagcttctagaagcaaaagaggtccctcaagagccccactgctgggtactgattgtacgttctctatatttctgggtgaggcctgttctcatcgctgg

M4F1-PshRev AGCGAGAGCGACGTCTGTCCGTTTCTCCTAAGAGCTGCTTA

M4F5-pRS413 cccctcacaggccaggaaactggggtcctcctcctcctgttaccagctcagtcctggggagatgcaggccaacgggtatgtcccagcatcaaaggcagcgttactcagcagcaACGCGTGCTCTCGCTCGGTAA  
TACGGTTATCCACAGAATCAGGGGATAACGCAGGAAAGAACATGTGAGCAAAAGGCCAGCAAAAGGCCAGGAACCGTAAAAAGGCCGCGTTGCTGGCGTTTTCCAA

mCherry-H3-Magoh-Rev atgctacgAAGCTTcctgtacagctgtccatgc

mCherry-NheI-Magoh-For AttagtatGCTAGCGATCCCGCCACCATGGTG

MMorCF-Agelfor AGCGAGAGCACCGGTgctctacgttttaggatggagaga

newPCFAgelrev AGCGAGAGCACCGGTCTTAAGATACATTGATGAGTTTGACA

PPIACerFibFor AGCGAGAGCACCGGTgctctacgttttaggatggagaga

PPIACerFibRev AGCGAGAGGCTAGCTGGCTAATAGTACACGGTTTTCTC

PPIA-Magohfor AGCGAGAGCCATATGtctctacgttttaggatggagaga

PPIA-MagohRev AGCGAGAGCGCTAGCGGCTAATAGTACACGGTTTTCTC

PSF-Agel-For ATTCACCGGTAATGGCCCGCCTGGCAT

PSF-Agel-Rev atgcACCGGTCAACACTCAACCCTATCTCGGTCTATTCT

R32CerLBAgelfor AGCGAGAGCACCGGTCCGCaagcaaaacaatcaagagcat

Rev-M4F5-Mlul AGCGAGAGCACCGGTgctctcagtgcaagcctg

RevCerFib TGCTATTGCTTTATTTGTAACCATTATAAGCTGC

RS413-Fw CGGTAATACGGTTATCCACAG

RS413-Rev CCTCGTTTCAAGTACACGT

Snap-Hpal-Fib-Rev atctactGTTAACttaTGCAGGACCCAGCCCAGG

Snap-Xmal-For atgctgCCCGGGcACCATGGACAAAGACTGCGAAAT

SpecFor TCAGTGTGGCCACTCGCGA

SpecRev AAGGACCCAGGTGGCACTT

ZeoMlulFor TATACGCTCGCTAGCTCGAGGGTGTGGA

ZeoMlulRev GGCACGCTAGACATGATAAGATACATTGATGAGTTTGACAA

**UG insertion site DNA FISH probe**

BZ#369 GGT CAG TCT CCT TGC TGG AC HBB BAC UG insertion site DNA FISH 1, 3.6 kb



|         |                                   |                                               |
|---------|-----------------------------------|-----------------------------------------------|
| BZ#370  | TTCTGAGTGAGCCTGGGTCT              | HBB BAC UG insertion site DNA FISH 1, 3.6 kb  |
| BZ#371  | GGTGCTGTGTGGCTTAGAGT              | HBB BAC UG insertion site DNA FISH 2, 2.96 kb |
| BZ#372  | ACTTATTGGCTGCGTACCCT              | HBB BAC UG insertion site DNA FISH 2, 2.96 kb |
| BZ#373  | ATCGATCAATATAGACTTCCAGTGA         | HBB BAC UG insertion site DNA FISH 3, 2.1 kb  |
| BZ#374  | CCCGGATCTAGGGTCTTTCA              | HBB BAC UG insertion site DNA FISH 3, 2.1 kb  |
| BZ#375  | CCTGCCATGTCATGCTGAGT              | HBB BAC UG insertion site DNA FISH 4, 2.6 kb  |
| BZ#376  | GCCGTAGGGAGGAGTTTCTG              | HBB BAC UG insertion site DNA FISH 4, 2.6 kb  |
| BZ #210 | TTAAGCGGCCGCATGACAGCAGAGATCCAGTTT | UBC-GFP-ZeoR reporter gene, 2.7 kb            |
| BZ #351 | GCTCCAATTCCATACCACATTTG           | UBC-GFP-ZeoR reporter gene, 2.7 kb            |
| BZ#379  | GGTTGTCTCCACCTCACTGG              | DHFR BAC UG insertion site DNA FISH 2, 2.7 kb |
| BZ#380  | GGTGAGAGCTGACTGCACTT              | DHFR BAC UG insertion site DNA FISH 2, 2.7 kb |
| BZ#381  | CCTGAGTGAAATGGCCTGGT              | DHFR BAC UG insertion site DNA FISH 3, 2.7 kb |
| BZ#382  | GCCACGGGTACTGACTGAAA              | DHFR BAC UG insertion site DNA FISH 3, 2.7 kb |
| BZ#383  | CCCACCCATCTGTGTCTGTC              | DHFR BAC UG insertion site DNA FISH 4, 3.1 kb |
| BZ#384  | AGACCCATAGCGAATGCCTG              | DHFR BAC UG insertion site DNA FISH 4, 3.1 kb |

**Supplementary Table S2. Sequence of a synthetic DNA fragment “RCS” containing multiple rare restriction sites**

| Name | Sequence                                                                 | Notes                          |
|------|--------------------------------------------------------------------------|--------------------------------|
| RCS  | 5' GGCCGCGGCGCGCCTTAATTAACCGGTG 3'<br>3' CGCCGCGCGGAATTAATTGGCCACGATC 5' | NotI overhang<br>NheI overhang |

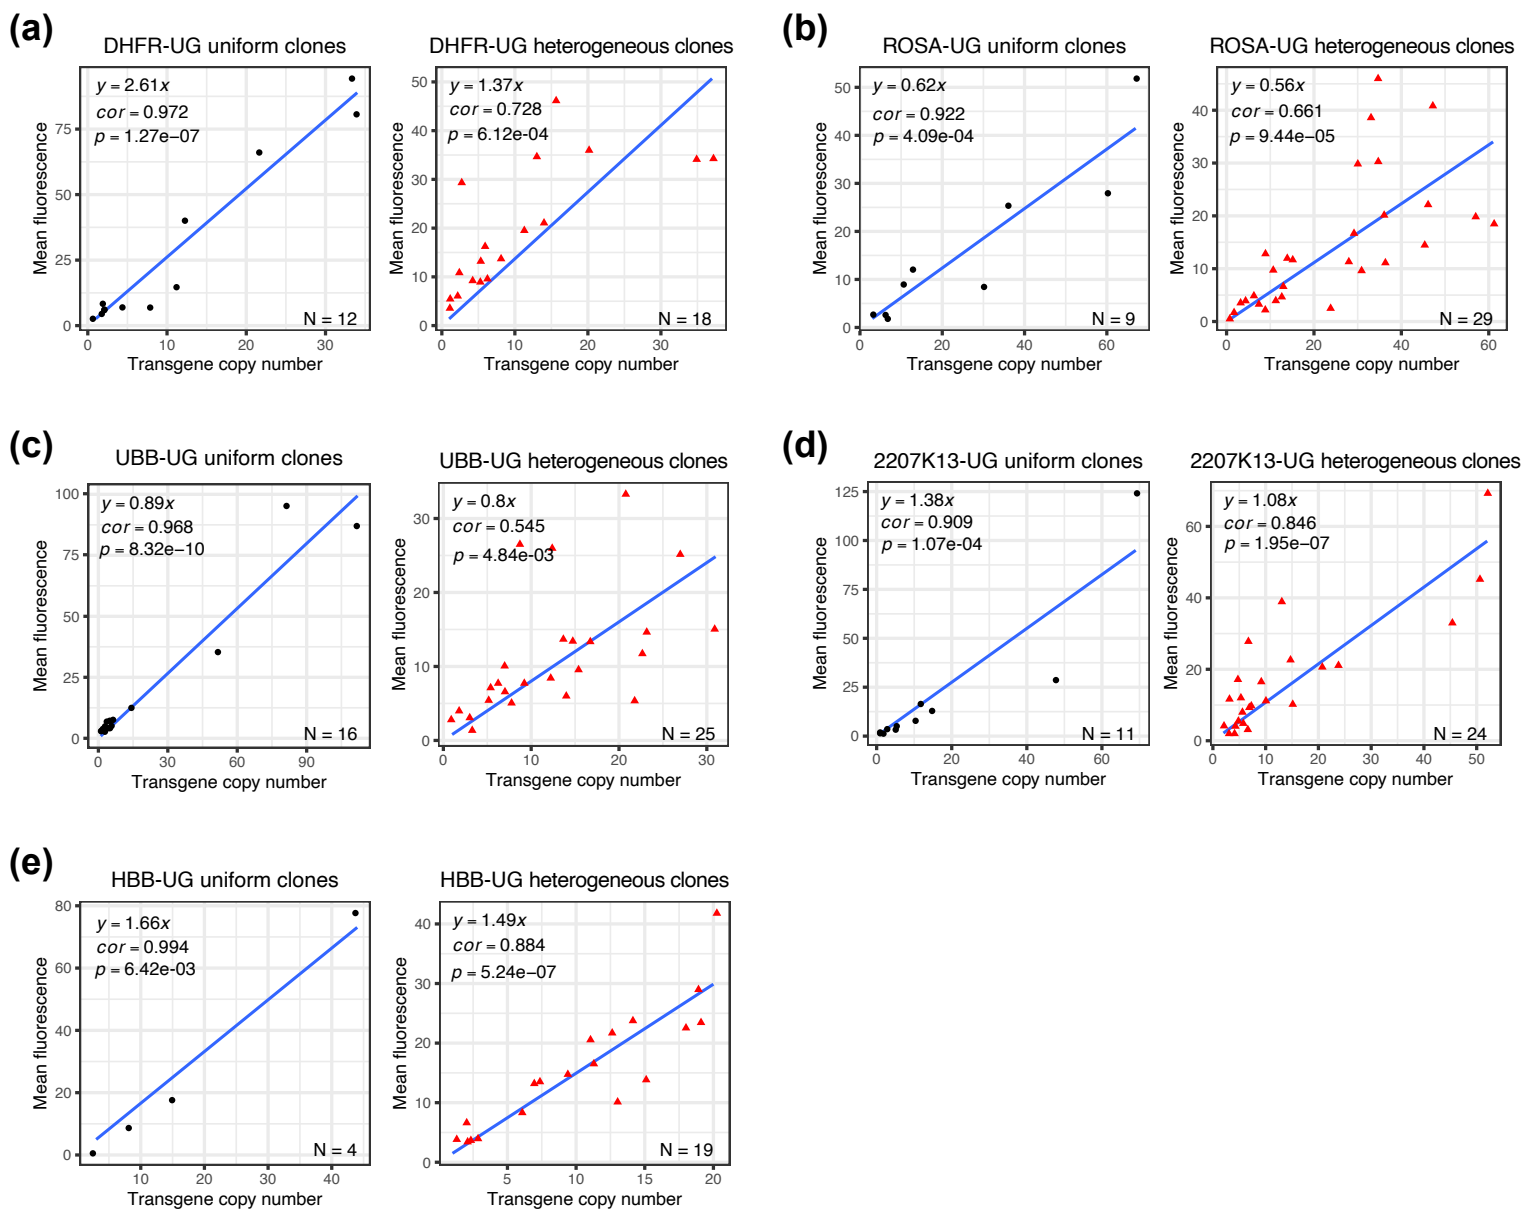

**Supplementary Figure S1. Linear correlation of transgene expression level vs copy number among uniform clones or heterogeneous clones.** (a-e) Scatter plots of mean normalized cellular GFP fluorescence (y-axis) vs reporter gene copy number (x-axis) for clonal populations transfected with different BAC scaffolds. Linear regression fits (blue lines, y-intercepts set to 0) are shown with corresponding Pearson correlation coefficients (cor), p-values of the correlation coefficients (p), and equations. Bottom right of plots: Number of clones analyzed. Left panels- clones showing uniform GFP expression; Right panels- clones showing heterogeneous GFP expression.

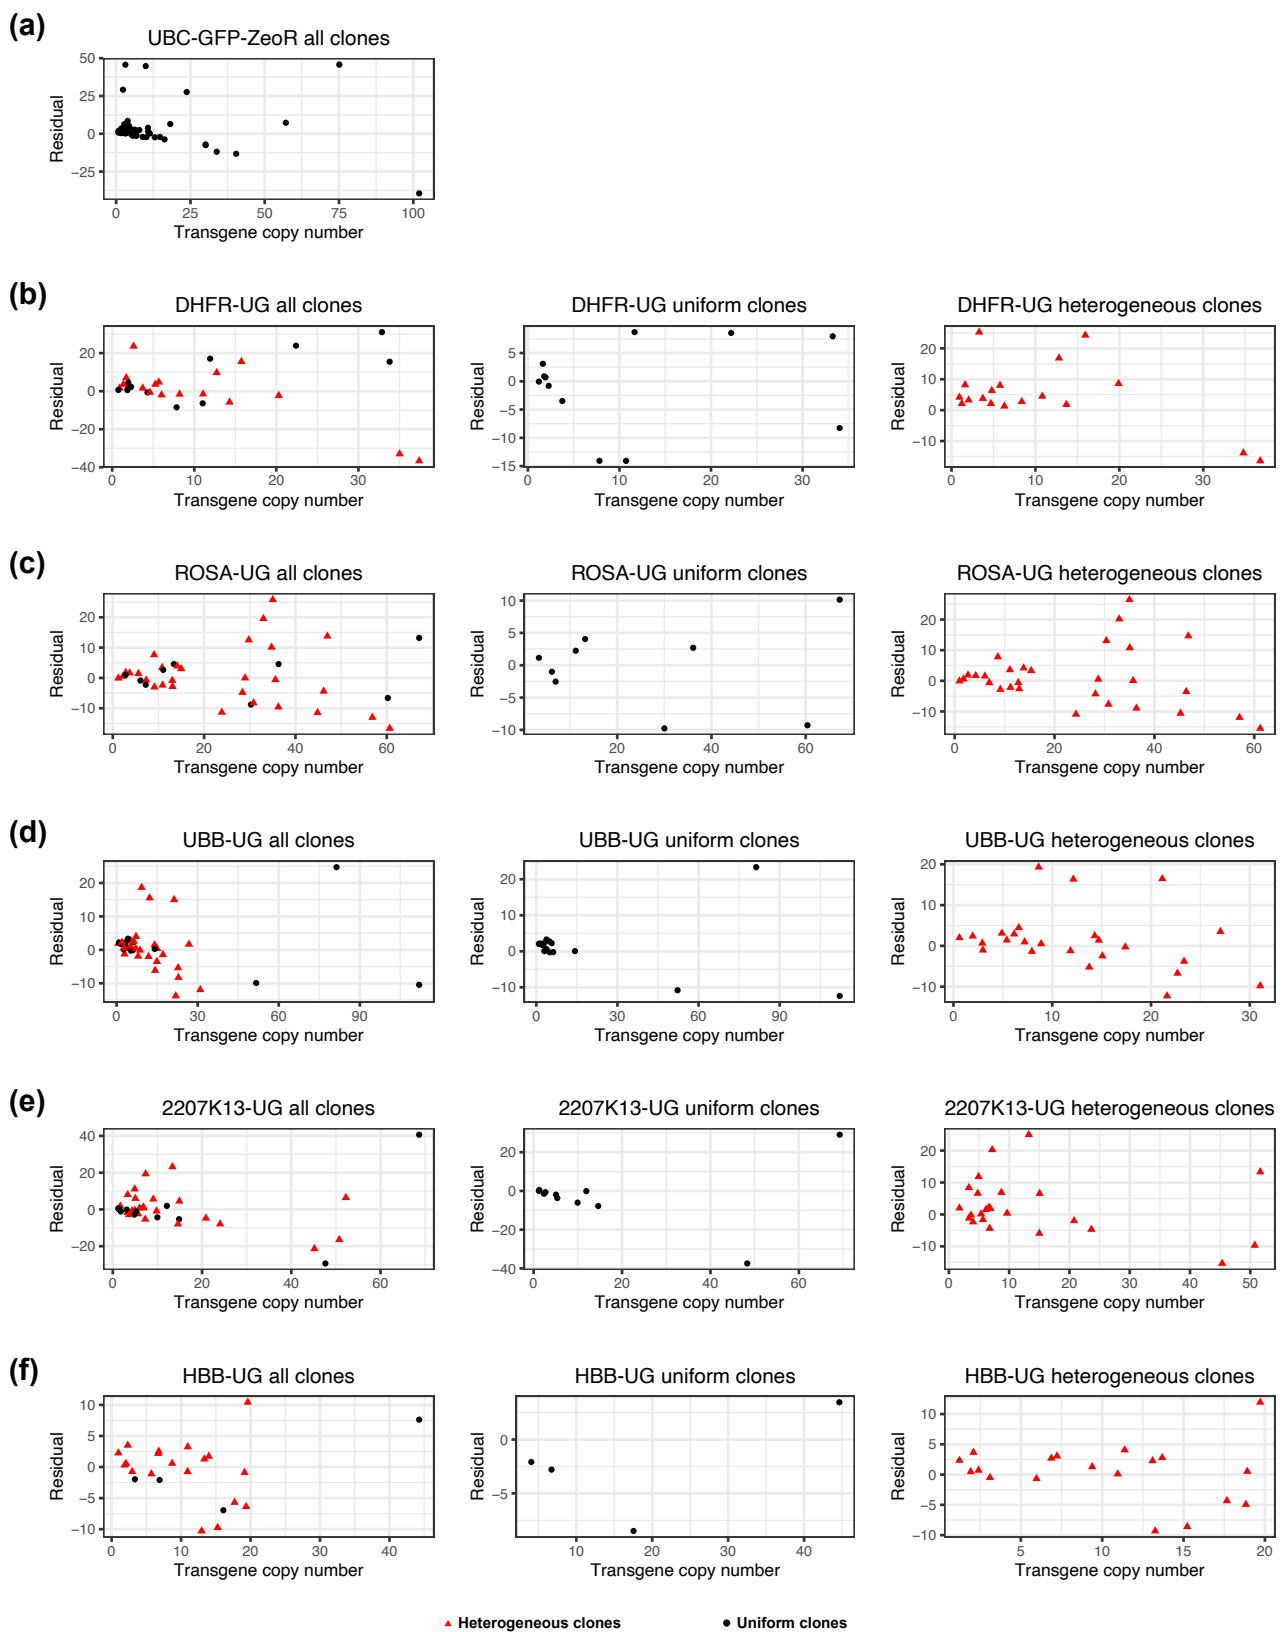

**Supplementary Figure S2. Residual plots of linear regression fits for mean normalized cellular GFP fluorescence vs reporter gene copy number.** (a-f) Scatter plots of residuals from linear regression fits (y-axis) vs reporter gene copy number (x-axis) for clonal populations transfected with the UBC-GFP-ZeoR cassette alone (a), or with different BAC scaffolds carrying the UBC-GFP-ZeoR reporter gene (b-f). Left panels: linear regression among clones showing uniform or heterogeneous GFP expression; Middle panels- linear regression among clones showing uniform GFP expression; Right panels- linear regression among clones showing heterogeneous GFP expression; Red triangles- heterogeneous clones; Black circles- uniform clones.

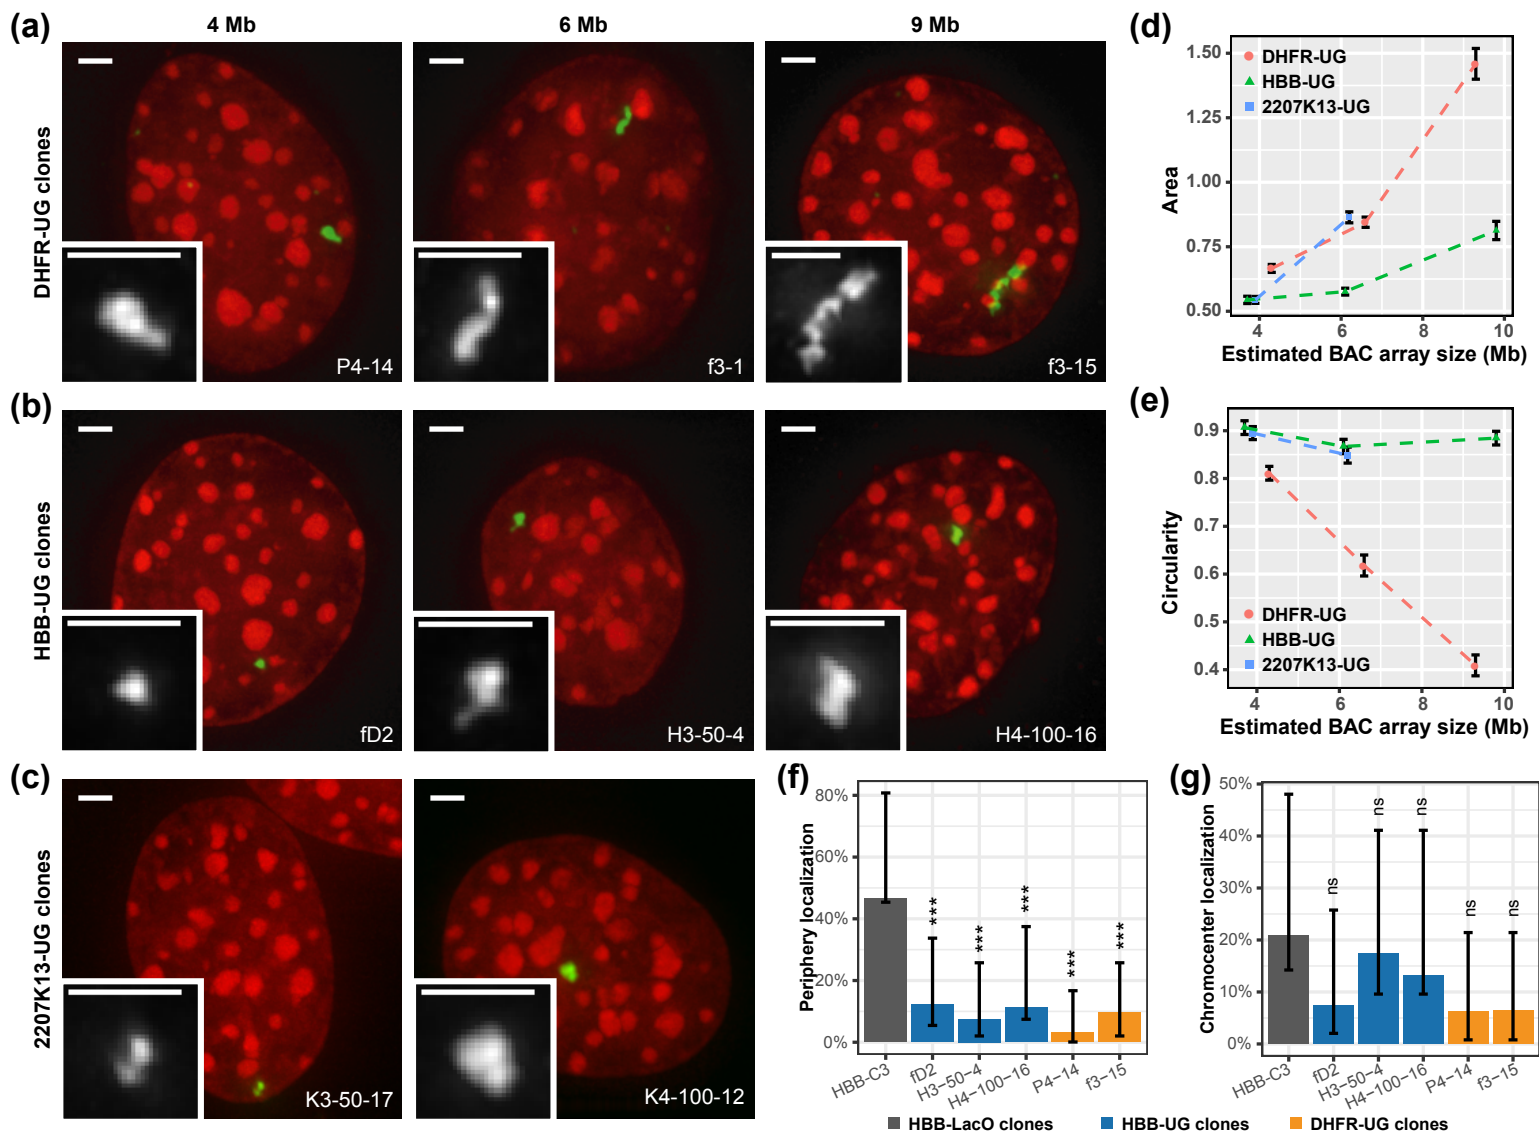

**Supplementary Figure S3. Repressive BAC transgene arrays with UBC-GFP-ZeoR reporter gene form highly condensed chromatin but have altered nuclear localization.** (a-c) 3D DNA FISH with BAC probes showing distinctive chromatin conformation formed by the DHFR-UG, HBB-UG, and 2207K13-UG BAC arrays. Maximum intensity z-projection images of three DHFR-UG clones (a), three HBB-UG clones (b), and two 2207K13-UG clones (c) are shown. Insets are enlarged FISH signals. Clone names are indicated at the bottom right of each image. Estimated sizes of the BAC transgene arrays are shown on the top. Red- DNA DAPI staining; Green- BAC FISH signal; Scale bars = 2  $\mu$ m. (d-e) Quantitation of FISH signals. Median area (d, y-axis, unit =  $\mu$ m<sup>2</sup>) or median circularity (e, y-axis) of the z-projected FISH signals are plotted against qPCR estimated BAC transgene array size (Mb, x-axis). Error bars represent standard error; Red- DHFR-UG clones; Green- HBB-UG clones; Blue- 2207K13-UG clones; Number of analyzed images for each clone = 56 ~81. (f-g) Percentage localization of different BAC transgenes visualized by 3D DNA FISH at nuclear periphery (f) and chromocenter (g). x-axis- clone names; Gray- HBB-C3 clone carrying integrated array of HBB BAC without UBC-GFP-Zeo cassette inserted; Blue- clones with integrated HBB-UG BAC arrays; Yellow- clones with integrated DHFR-UG BAC arrays; Number of images analyzed- 43 for HBB-C3, 41 for fd2, 40 for H3-50-4, 53 for H4-100-16, 32 for P4-14, 31 for f3-15; Error bars represent 95% confidence intervals based on binomial distribution; p-values are calculated using two-sided Fisher's Exact Test comparing individual clones to clone HBB-C3 (\*\*\*: p-value < 0.001; ns: p-value > 0.1).

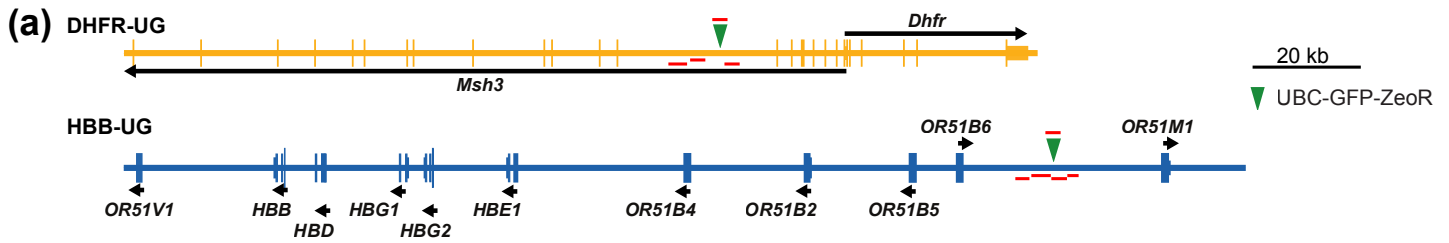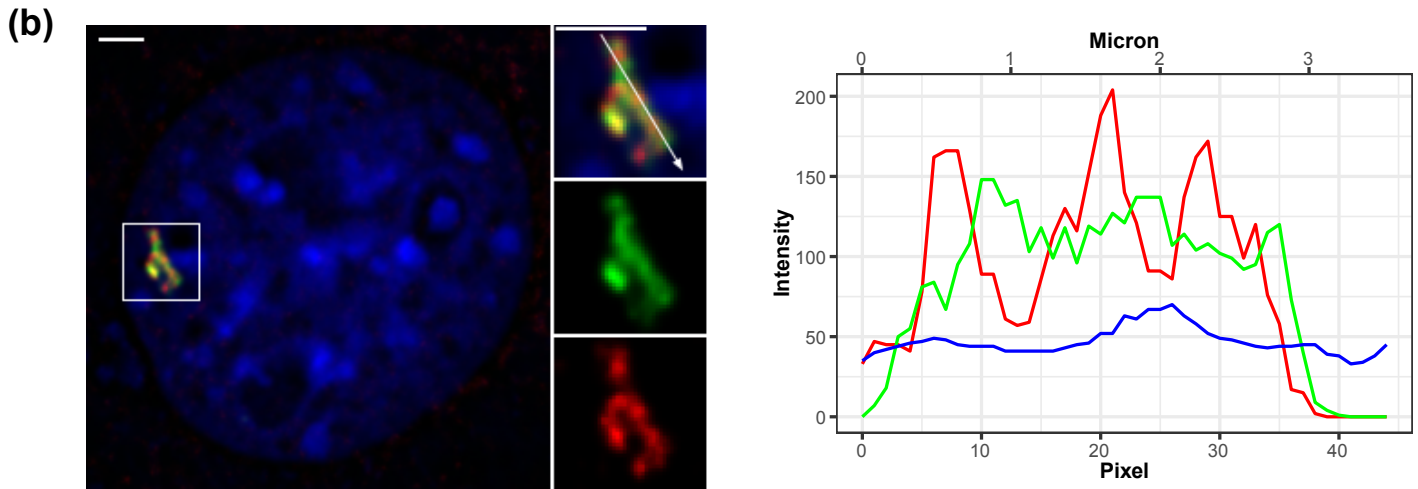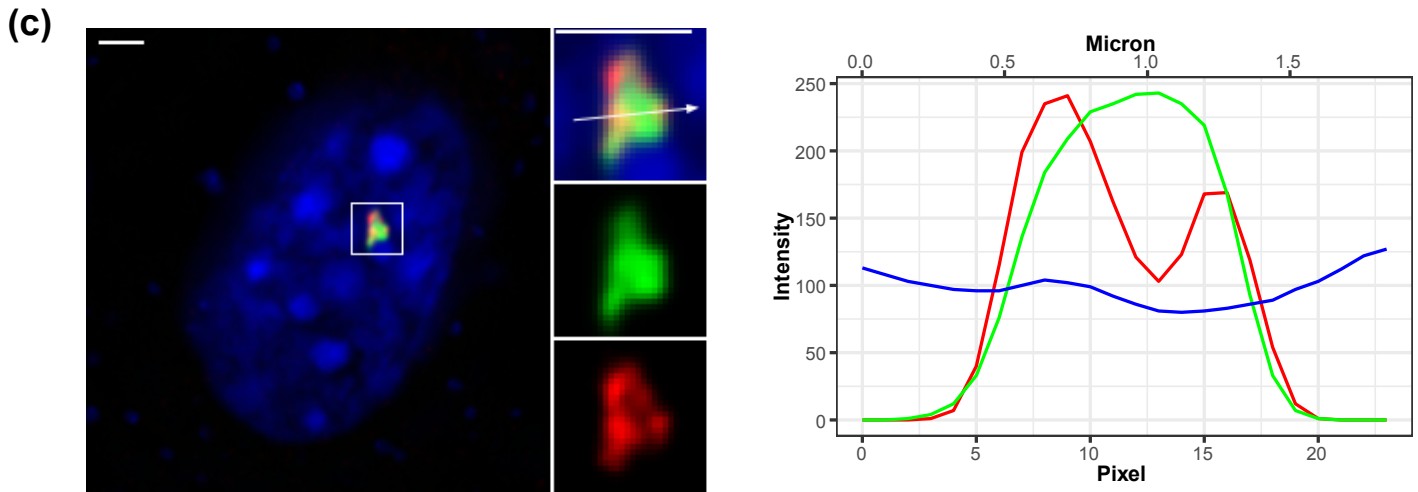

**Supplementary Figure S4. Differential localization of the UBC-GFP-ZeoR reporter gene sequence in DHFR vs HBB BAC transgene territories.** (a) DNA FISH probe regions (red lines) for visualizing the UBC-GFP-ZeoR reporter gene and ~12-15 kb regions around its insertion sites on the DHFR and HBB BAC. Longer vertical bars- exons; shorter vertical bars- UTRs; black arrows or arrowheads- direction of transcription; green arrow heads- UBC-GFP-ZeoR insertion site. (b-c) Two-color DNA FISH with BAC (green) and UBC-GFP-ZeoR insertion region (red) probes over DHFR-UG clone f3-15 (b) and HBB-UG clone H4-100-16 (c). Sections with FISH signals in focus are shown. Insets are enlarged regions within the white squares. Intensity line scans along arrows are plotted in the right panels. Blue- DNA DAPI staining; Scale bars = 2  $\mu$ m.

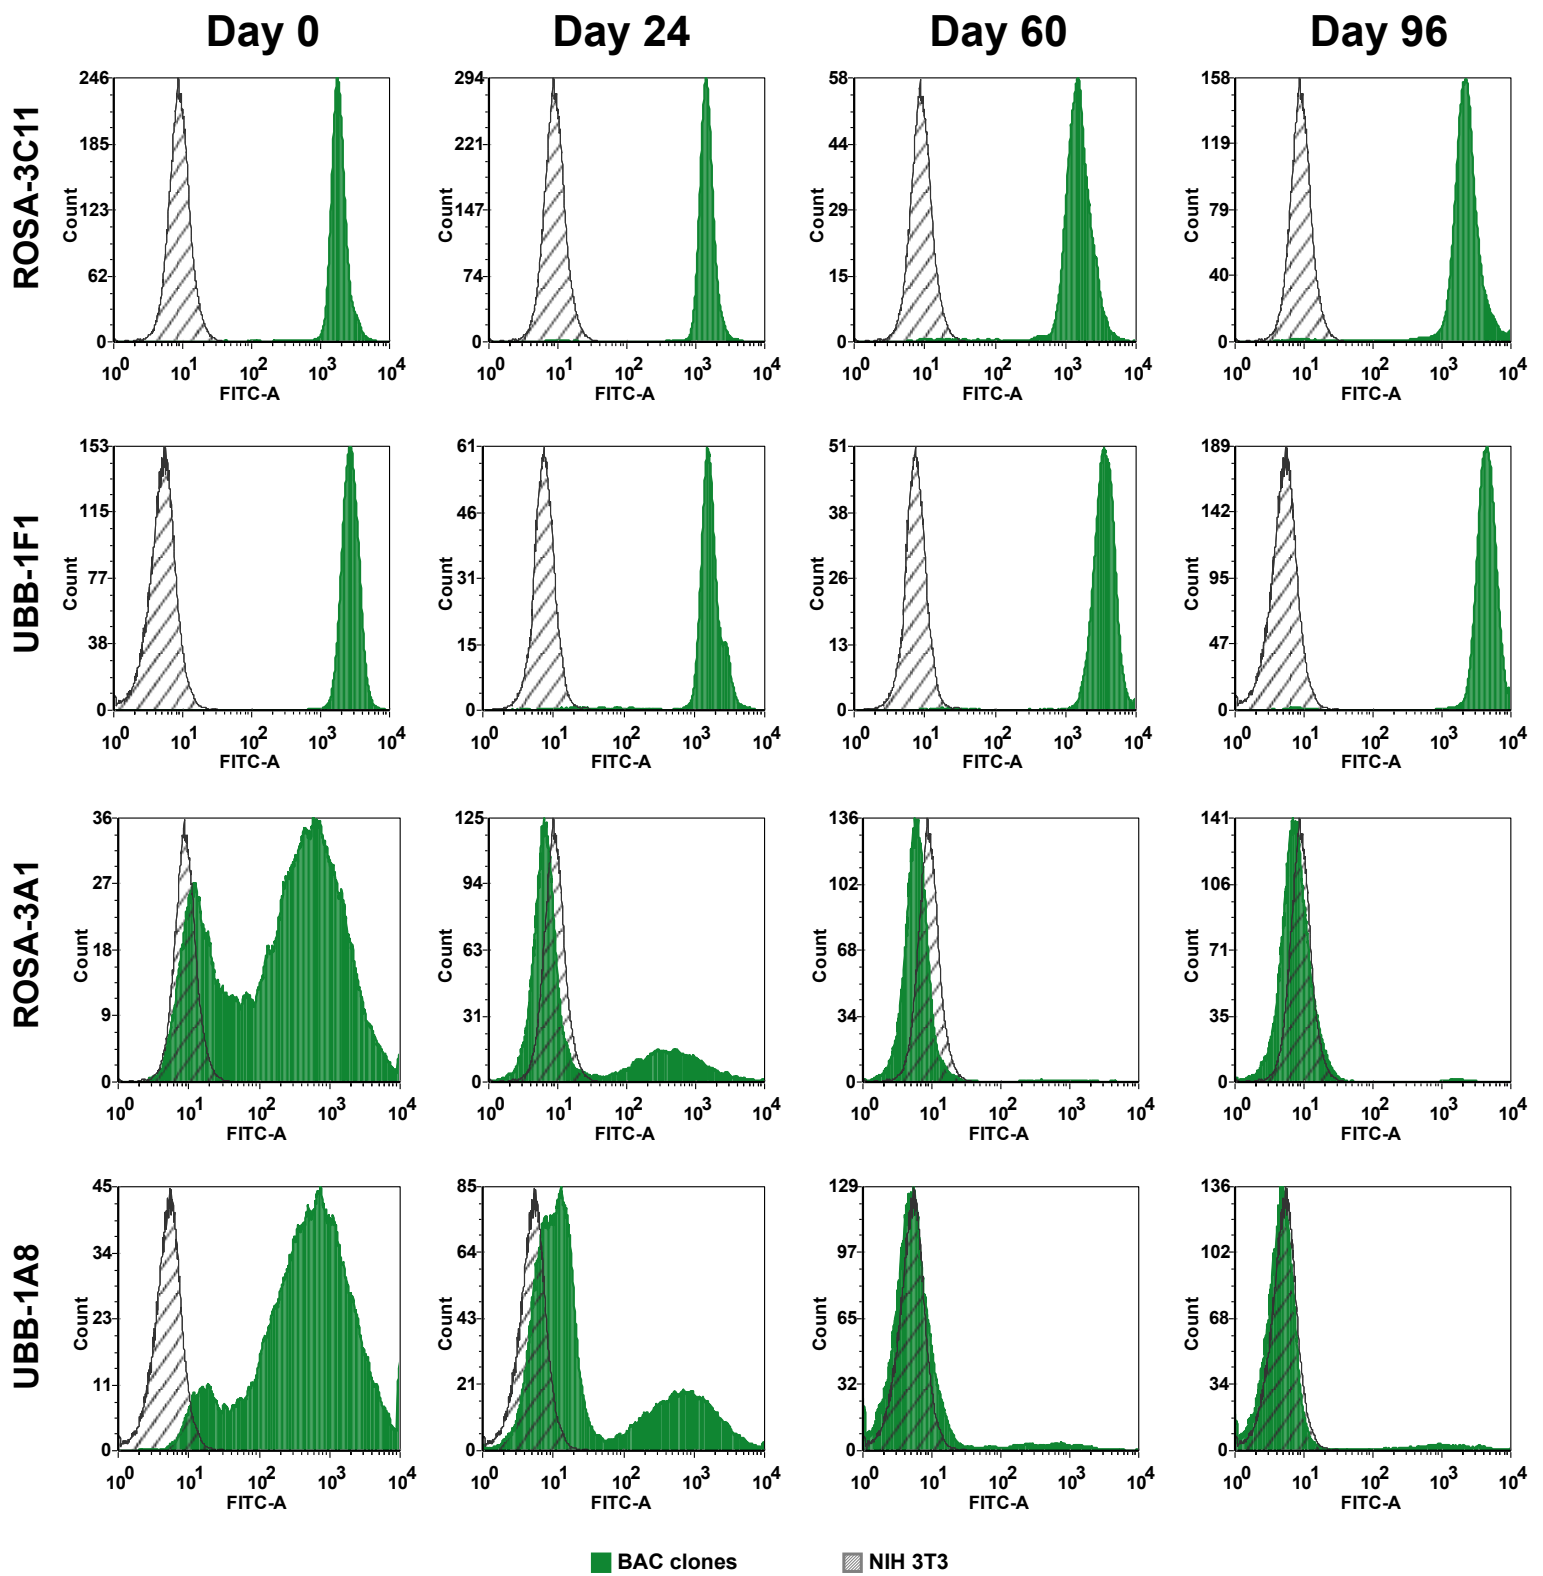

**Supplementary Figure S5. GFP fluorescence histogram of representative “uniform” and “heterogeneous” expressing NIH 3T3 clones at day 0, 24, 60 and 96 without selection obtained by flow-cytometry. Gray- autofluorescence of untransfected cells; Green- GFP fluorescence of the indicated clones; x-axis- fluorescence; y- axis- cell number.**

## REPORTER MODULES

## INTERVENING DHFR MODULES

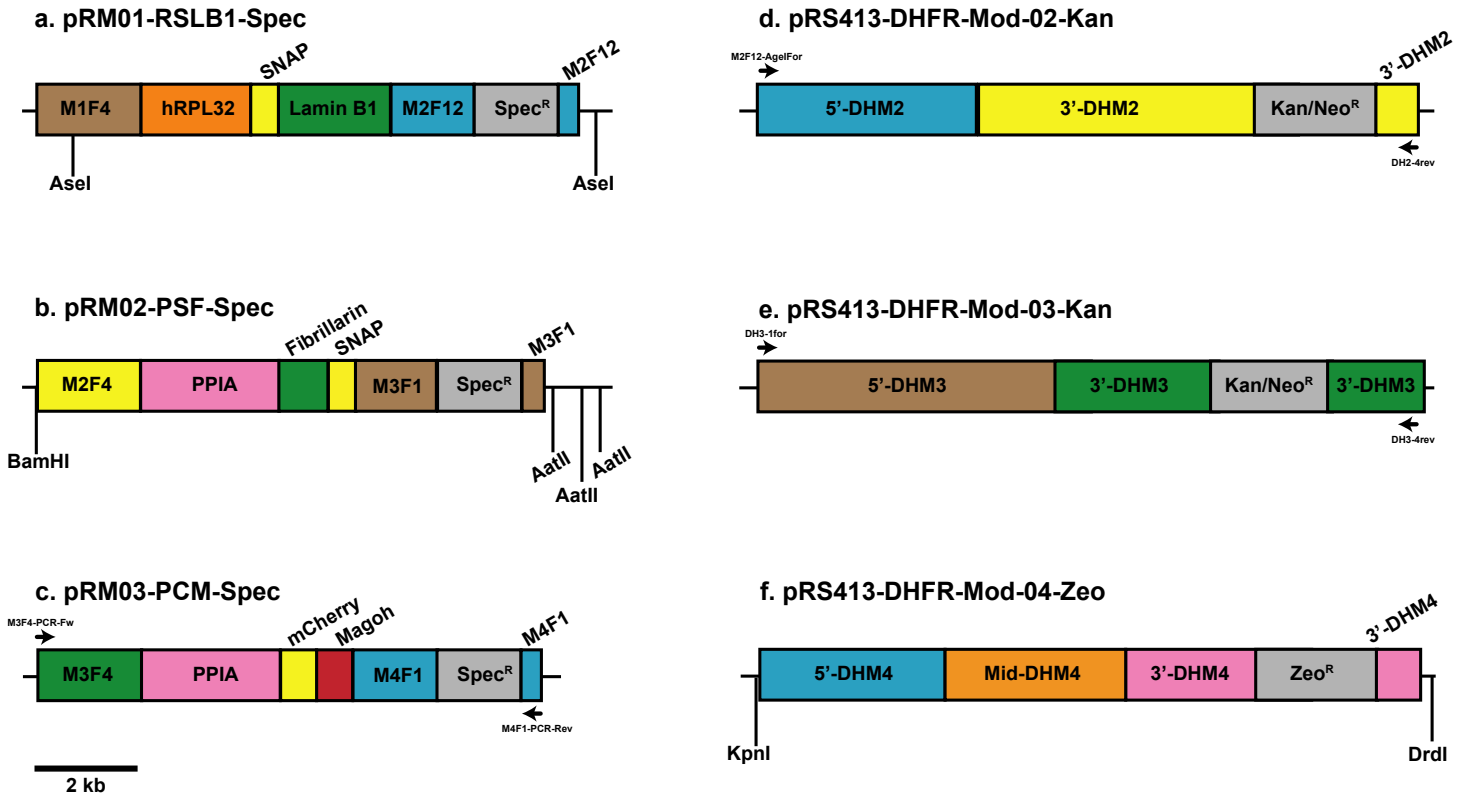

**Supplementary Figure S6. Maps of Reporter and DHFR modules used for BAC-MAGIC.** (a-c) reporter expression cassettes subcloned in the respective reporter recipient modules harboring Spec<sup>R</sup> selection marker (gray). (d-e) Schematics of the intervening DHFR modules harboring Kan/Neo<sup>R</sup> or Zeo<sup>R</sup> selection markers (gray). (a-e) Longer vertical bars represent the indicated restriction endonucleases used to generate recombineering fragments and arrows show the binding sites of primers used for amplification of recombineering fragments. See Methods for details of terminal regions corresponding to DHFR BAC homology regions. Scale bar = 2 kb.



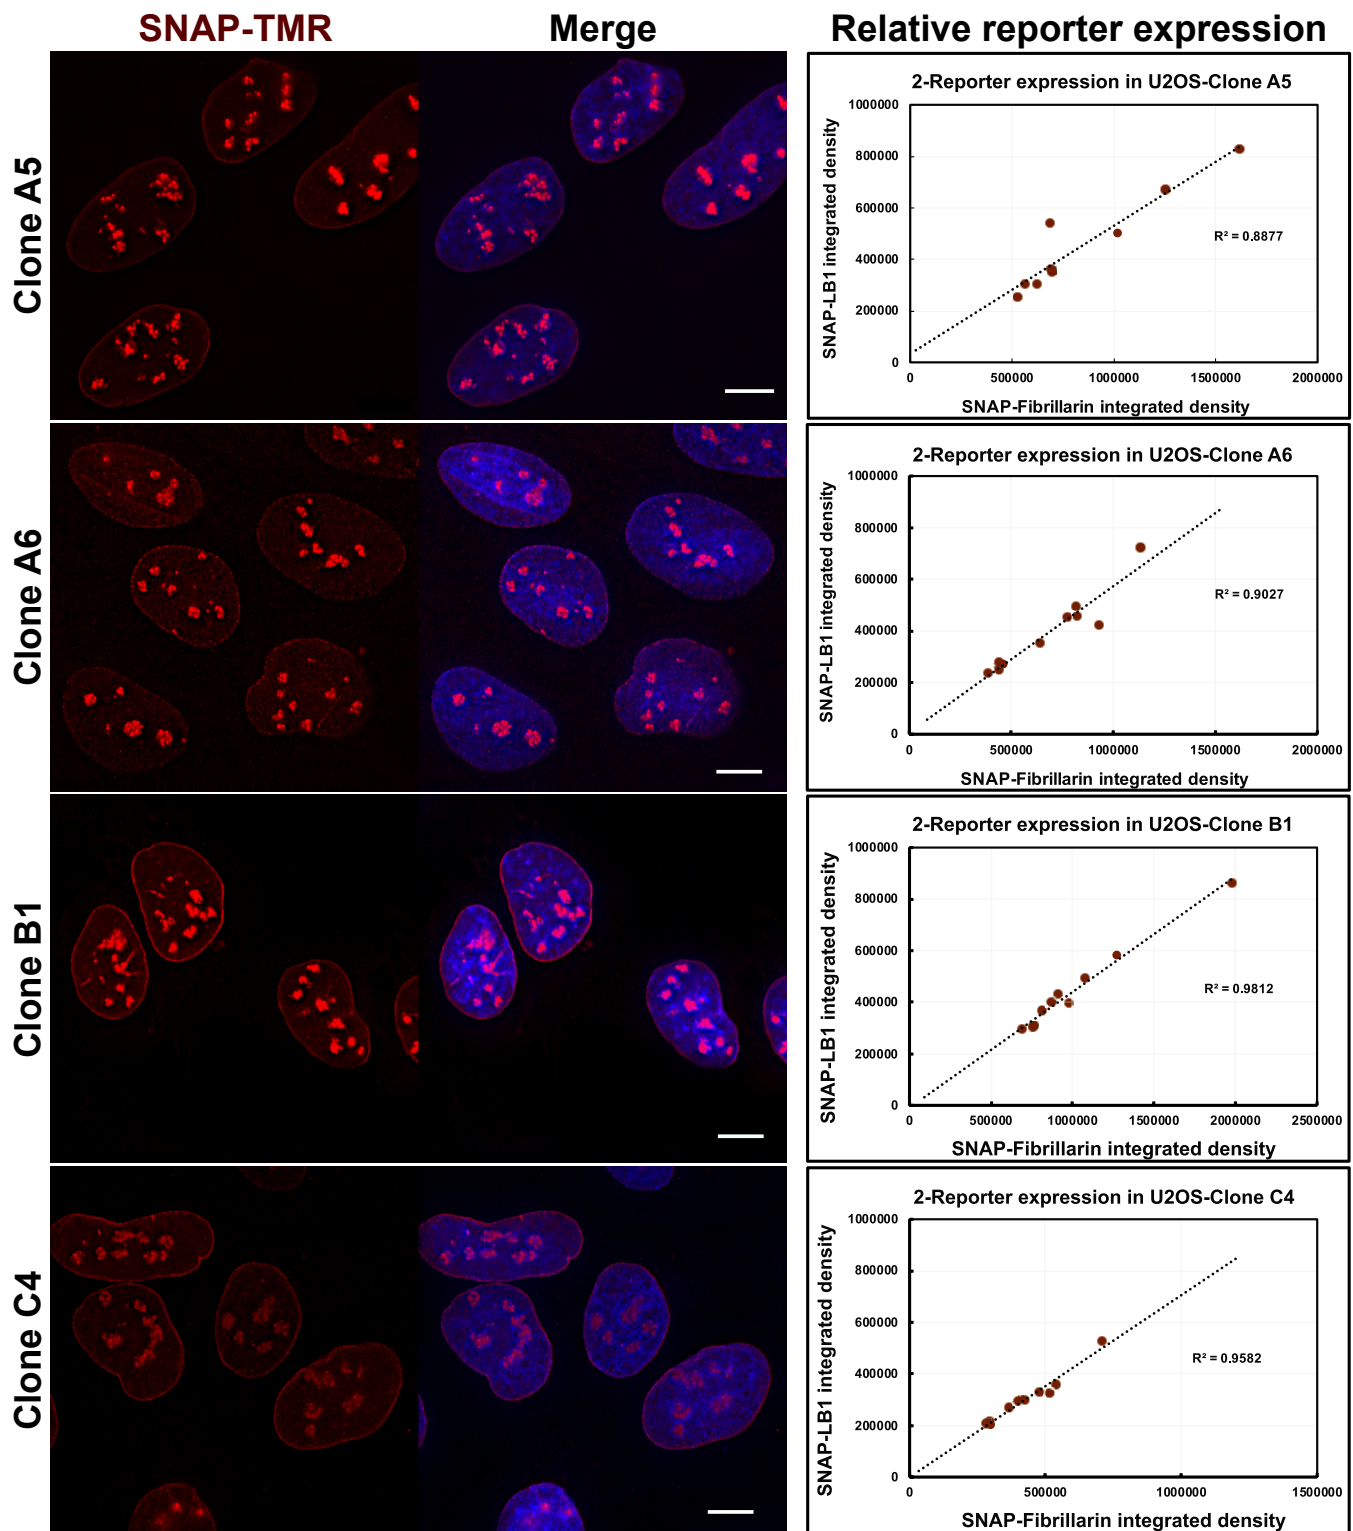

**Supplementary Figure S7. Expression of dual-reporter BAC in U2OS cells.** Representative images (maximum intensity projections of 3-4 optical sections) from the four independent cell clones (Clone A5, A6, B1 and C4) showing expression of the two reporter genes. Nuclear lamina is labeled with SNAP-tagged Lamin B1 (red), nucleoli with SNAP-tagged Fibrillarin (red), and nucleus is counterstained with DAPI (blue). Scale bars = 5  $\mu$ m.
